# Supplementary material
Source: PubMed Central journal article supplement (PMC6454510)
Supplement: bgx126_suppl_supplementary_tables.pdf [file bgx126_suppl_supplementary_tables.pdf]

**Supplementary Table 1**

| <b>Variables</b>                                                     | <b>Cases</b>     | <b>Controls</b>   | <b>Median Difference (IC95%)</b> | <b>T-Student p-value</b> |
|----------------------------------------------------------------------|------------------|-------------------|----------------------------------|--------------------------|
| <b>Age, year;</b><br><i>median (SD)</i>                              | 44 (5)           | 45 (5)            | 0:2                              | 0.74                     |
| <b>Age at menarche, year;</b><br><i>median (Interquartile Range)</i> | 13 (12-14)       | 13 (12-14)        | 0.7:1.3                          | 0.64                     |
| <b>IGF1;</b><br><i>median, (Interquartile Range)</i>                 | 157 (130-190)    | 151 (125.5-185)   | -6.5:10.5                        | 0.15                     |
| <b>TTS;</b><br><i>median (Interquartile Range)</i>                   | 0.26 (0.2-0.36)  | 0.25 (0.19-0.33)  | -0.03:0.03                       | 0.21                     |
| <b>BMI, kg/m<sup>2</sup>;</b><br><i>median (Interquartile Range)</i> | 24.1 (23.3-28.3) | 24.04 (23.6-28.4) | -1.1:0.68                        | 0.6                      |
| <b>Fasting glucose;</b><br><i>median (Interquartile Range)</i>       | 84 (77-91)       | 84 (77-90)        | -1:3                             | 0.65                     |
| <b>Alcohol intake, g/d</b><br><i>median (Interquartile Range)</i>    | 1.7 (0-12)       | 1.7 (0-12)        | -0.8:4.2                         | 0.59                     |
| <b>Age at first birth</b><br><i>median (SD)</i>                      | 26 (3.7)         | 25 (3.8)          | -1.7:-0.26                       | 0.19                     |
| <b>Full term pregnancies</b><br><i>median (SD)</i>                   | 2 (0.95)         | 2 (1.1)           | -0.21:0.21                       | 0.02                     |
| <b>Smoking</b><br><i>% of smoker/ex smoker/not smoker</i>            | 21/19/60         | 19/11/70          | -                                | 0.4*                     |

**Supplementary Table 2**

| <i>Down-Regulated microRNAs</i> |                            |                              |                         |
|---------------------------------|----------------------------|------------------------------|-------------------------|
| <b>microRNA</b>                 | <b>Log FC <sup>1</sup></b> | <b>P values <sup>2</sup></b> | <b>FDR <sup>3</sup></b> |
| miRNA-431                       | -0.5448                    | 0.0006                       | 0.1301                  |
| miRNA-550*                      | -0.4235                    | 0.0008                       | 0.1301                  |
| miRNA-23b                       | -0.3405                    | 0.0008                       | 0.1301                  |
| miRNA-654-3p                    | -0.4179                    | 0.0021                       | 0.2548                  |
| miRNA-183*                      | -0.464                     | 0.0028                       | 0.2627                  |
| miRNA-326                       | -0.2396                    | 0.0036                       | 0.3002                  |
| miRNA-197                       | -0.2239                    | 0.0048                       | 0.3234                  |
| miRNA-361-3p                    | -0.2194                    | 0.0059                       | 0.3343                  |
| miRNA-128                       | -0.2769                    | 0.0063                       | 0.3343                  |
| miRNA-155                       | -0.1877                    | 0.0079                       | 0.3775                  |
| miRNA-92a                       | -0.1419                    | 0.0089                       | 0.3948                  |
| <i>Up-Regulated microRNAs</i>   |                            |                              |                         |
| miRNA-513c-5p                   | 0.5737                     | 0.0001                       | 0.087                   |
| miRNA-513a-5p                   | 0.753                      | 0.0004                       | 0.1301                  |
| miRNA-1275                      | 0.5052                     | 0.0021                       | 0.2548                  |
| miRNA- 498                      | 0.3348                     | 0.0024                       | 0.2568                  |
| miRNA-513b-5p                   | 0.4786                     | 0.0039                       | 0.3002                  |
| miRNA- let-7c*                  | 0.2745                     | 0.0049                       | 0.3234                  |
| miRNA- 370                      | 0.5398                     | 0.0059                       | 0.3343                  |
| miRNA- 518-3p                   | 0.189                      | 0.008                        | 0.3775                  |
| miRNA-1254                      | 0.4851                     | 0.0094                       | 0.3948                  |

**Supplementary Table 3**

| <b>pathway</b>                                       | <b>source</b> | <b>genes</b>                          | <b>p-value</b> |
|------------------------------------------------------|---------------|---------------------------------------|----------------|
| NFAT and hypertrophy of the heart                    | BioCarta      | HDAC9; NFATC1; SHC1                   | 2.37E-04       |
| IL-6 signaling pathway                               | BioCarta      | SHC1; IL6R                            | 5.69E-04       |
| MAPK signaling pathway                               | KEGG          | NFATC1; DUSP6; GNA12; TP53;<br>CACNB2 | 6.32E-04       |
| Role of ERBB2 in signal transduction<br>and oncology | BioCarta      | SHC1; IL6R                            | 2.88E-03       |
| Th17 cell differentiation                            | KEGG          | NFATC1; IL6ST; IL6R                   | 3.16E-03       |
| BCR signaling pathway                                | BioCarta      | NFATC1; SHC1                          | 3.50E-03       |
| Sphingolipid signaling pathway                       | KEGG          | TP53; GNA12; SGMS1                    | 4.36E-03       |

**Supplementary Table 4**

| <b>pathway</b>                                  | <b>source</b> | <b>genes</b>                                                                                                          | <b>p-value</b> |
|-------------------------------------------------|---------------|-----------------------------------------------------------------------------------------------------------------------|----------------|
| Hypertrophic cardiomyopathy (HCM)               | KEGG          | TGFB3; ITGB8; SGCD; TPM2; TPM1; ITGA7; CACNA2D2                                                                       | 2.58E-03       |
| Dilated cardiomyopathy                          | KEGG          | TGFB3; ITGB8; SGCD; TPM2; TPM1; ITGA7; CACNA2D2                                                                       | 3.82E-03       |
| Insulin signaling pathway<br>role of EGFR       | KEGG          | ACACB; PPP1R3B; SOCS2; MKNK1; IRS1; IKBKB; SORBS1; SHC1; TSC1                                                         | 4.31E-03       |
| Transactivation by GPCRS in cardiac hypertrophy | BioCarta      | IKBKB; EDNRA; GNB1; SHC1                                                                                              | 6.09E-03       |
| Pathways in cancer                              | KEGG          | IKBKB; ARHGEF12; TGFB3; AXIN2; PDGFRB; GNB1; GNB3; CASP9; GLI2; RUNX1; RUNX1T1; TPR; EDNRA; AGTR1; LAMC1; DAPK2; FGF1 | 8.30E-03       |
| MAPK signaling pathway                          | BioCarta      | IKBKB; MAP3K8; MAP4K5; MAPK11; MEF2D                                                                                  | 8.89E-03       |
| Neuroactive ligand-receptor interaction         | KEGG          | MC1R; APLNR; CALCRL; GRIA3; GLRB; HTR1F; MCHR2; GRM8; EDNRA; F2RL2; AGTR1; P2RX2; GABRB2                              | 9.56E-03       |
| Sprouty regulation of tyrosine kinase signals   | BioCarta      | SPRY1; SHC1; PTPRB                                                                                                    | 9.61E-03       |
| PI3K-Akt signaling pathway                      | KEGG          | PDGFRB; TEK; TNN; THBS2; ITGB8; GNB1; IRS1; GNB3; ITGA7; IKBKB; CASP9; PDGFD; LAMC1; FGF1; TSC1                       | 9.92E-03       |

**Supplementary table 5**

| <b>miRNA</b>    | <b><math>\beta</math></b> | <b>pval</b> |
|-----------------|---------------------------|-------------|
| hsa-miR-23b     | 0.37                      | 0.1         |
| hsa-miR-361-3p  | 0.16                      | 0.47        |
| hsa-miR-128     | -0.16                     | 0.48        |
| hsa-miR-1275    | 0.18                      | 0.41        |
| hsa-miR-197     | 0.25                      | 0.25        |
| hsa-miR-326     | -0.2                      | 0.35        |
| hsa-miR-183*    | 0.06                      | 0.77        |
| hsa-miR-550*    | 0.21                      | 0.33        |
| hsa-miR-155     | 0.09                      | 0.69        |
| hsa-miR-370     | 0.13                      | 0.54        |
| hsa-miR-1254    | 0.1                       | 0.62        |
| hsa-miR-513a-5p | 0.39                      | 0.07        |
| hsa-miR-513b    | 0.26                      | 0.24        |
| hsa-miR-513c    | -0.02                     | 0.9         |
| hsa-miR-654-3p  | -0.08                     | 0.7         |
| hsa-miR-431     | 0.03                      | 0.87        |
| hsa-miR-498     | -0.06                     | 0.78        |
| hsa-miR-518d-3p | -0.29                     | 0.28        |
| hsa-miR-92a     | -0.08                     | 0.7         |

**Supplementary Table 6**

| <b>Gene</b> |    | <b>Sequence</b>                     |
|-------------|----|-------------------------------------|
| GAPDH       | FW | 5'---GAGTCAACGGATTTGGTCGT---3'      |
|             | RV | 5'---GACAAGCTTCCCGTTCTCAG---3'      |
| PR          | FW | 5'---ATGACTGCATCGTTGATAAAAATCC---3' |
|             | RV | 5'---TTTTCGACCTCCAAGGACCAT---3'     |
| ATP1B1      | FW | 5'---TGGCATCTTCATCGGAACCA---3'      |
|             | RV | 5'---TGCCTCATAGCTCTTGGGAT---3'      |
